# Supplementary material for: Deep Excavation of the Gate of the Orient in Suzhou Stiff Clay: Composite Earth-Retaining Systems and Dewatering Plans
Source: Atypon-hosted journal article supplement (doi:10.1061/(asce)gt.1943-5606.0001837), 2017-12-23
Supplement: supplemental_data_gt.1943-5606.0001837_tan.pdf [file supplemental_data_gt.1943-5606.0001837_tan.pdf]

## SUPPLEMENTAL DATA

*ASCE Journal of Geotechnical and Geoenvironmental Engineering*

# Deep Excavation of the Gate of the Orient in Suzhou Stiff Clay: Composite Earth Retaining Systems

Yong Tan, Ye Lu and Dalong Wang

**DOI:** 10.1061/(ASCE)GT.1943-5606.0001837

© ASCE 2017

[www.ascelibrary.org](http://www.ascelibrary.org)

# SUPPLEMENTAL DATA

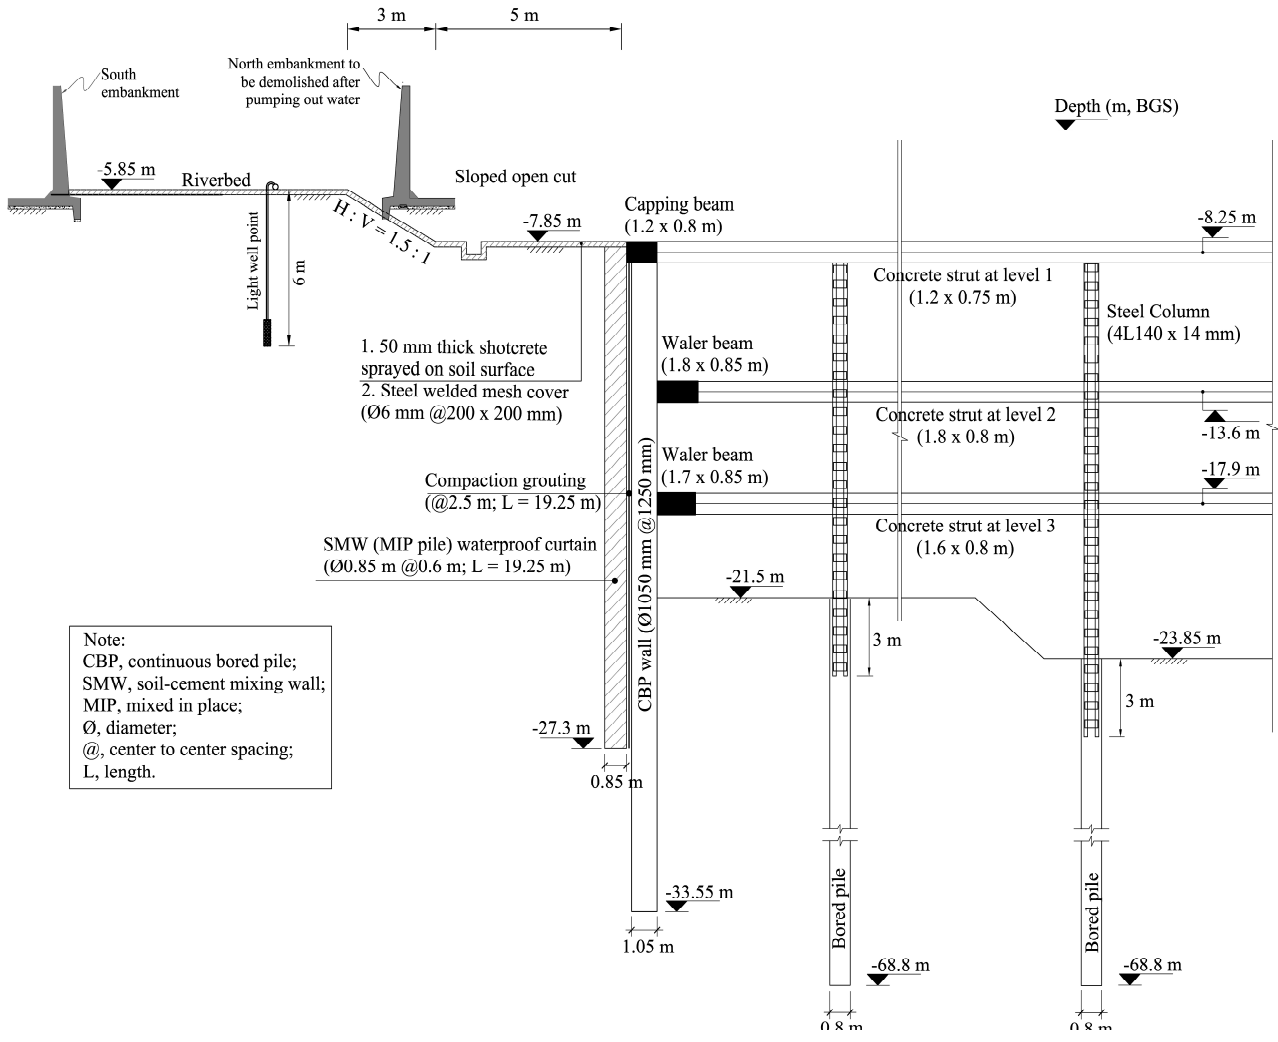

**Fig. S1.** Cross-section of the pit along the south side.

## SUPPLEMENTAL DATA

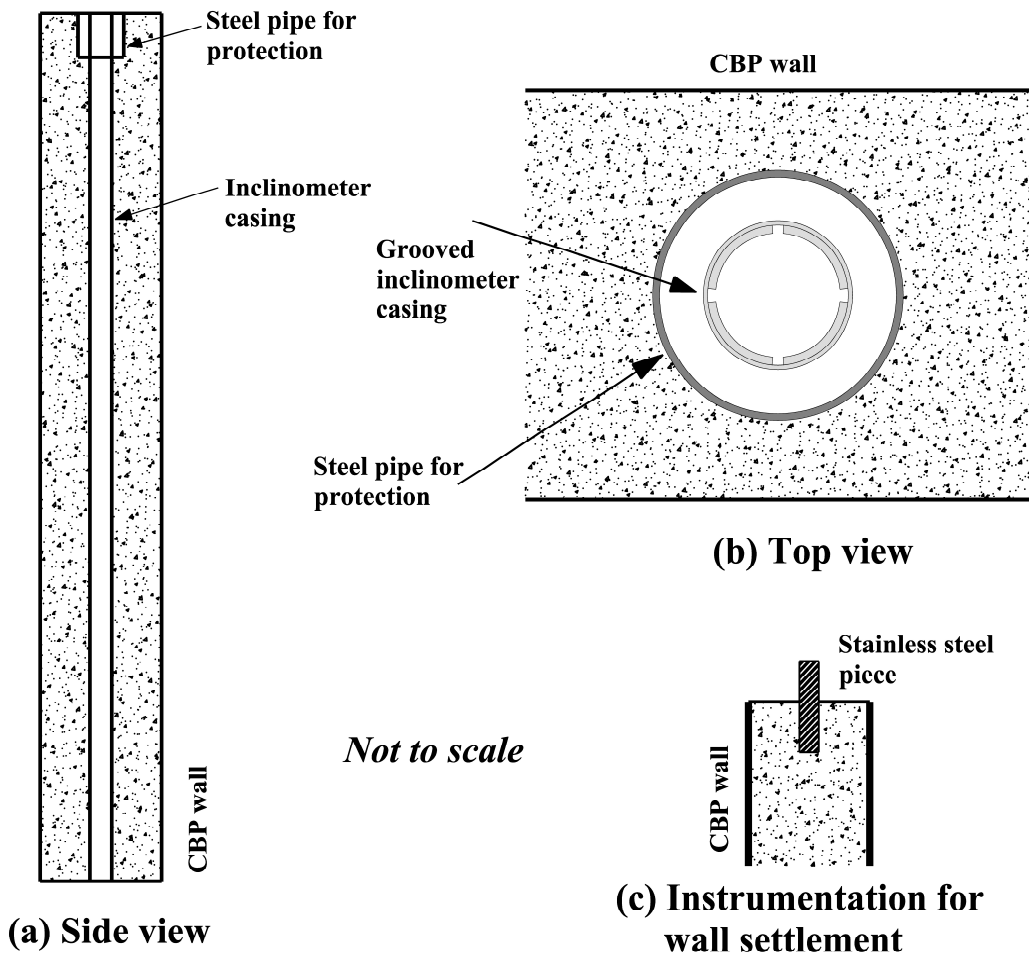

**Fig. S2.** View of the instrumentation layout of retaining wall for monitoring lateral wall displacements: (a) side view; (b) top view; (c) instrumentation for wall settlement.

**SUPPLEMENTAL DATA**

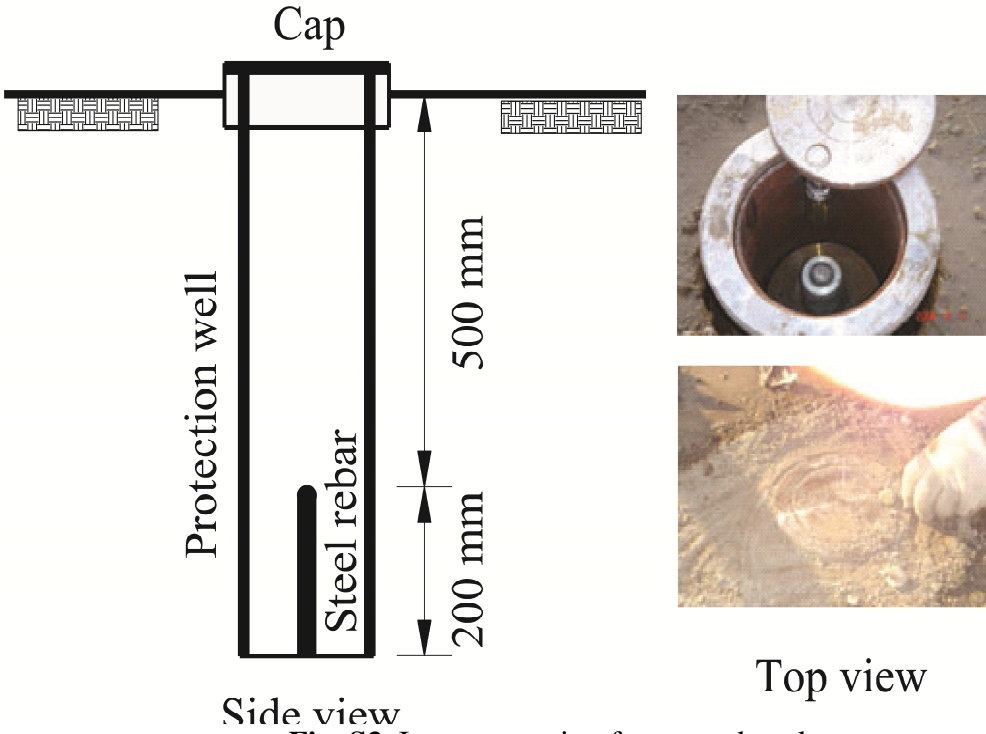

Side view

Top view

**Fig. S3.** Instrumentation for ground settlement.



## SUPPLEMENTAL DATA

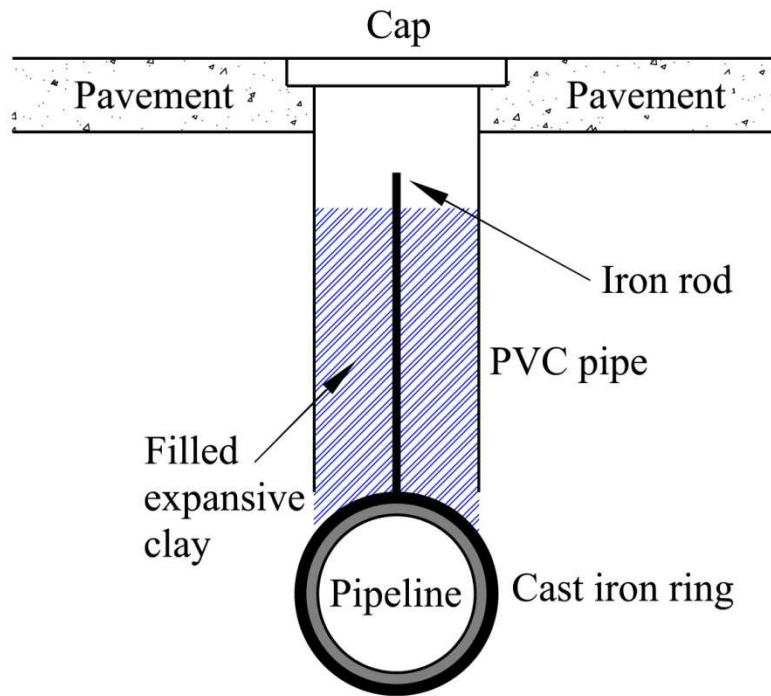

**Fig. S4.** Instrumentation for settlement of buried pipeline.

## SUPPLEMENTAL DATA

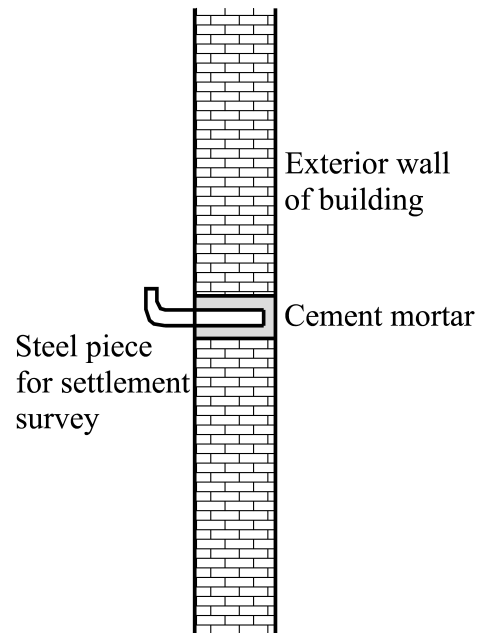

**Fig. S5.** Instrumentation for building settlement.

# SUPPLEMENTAL DATA

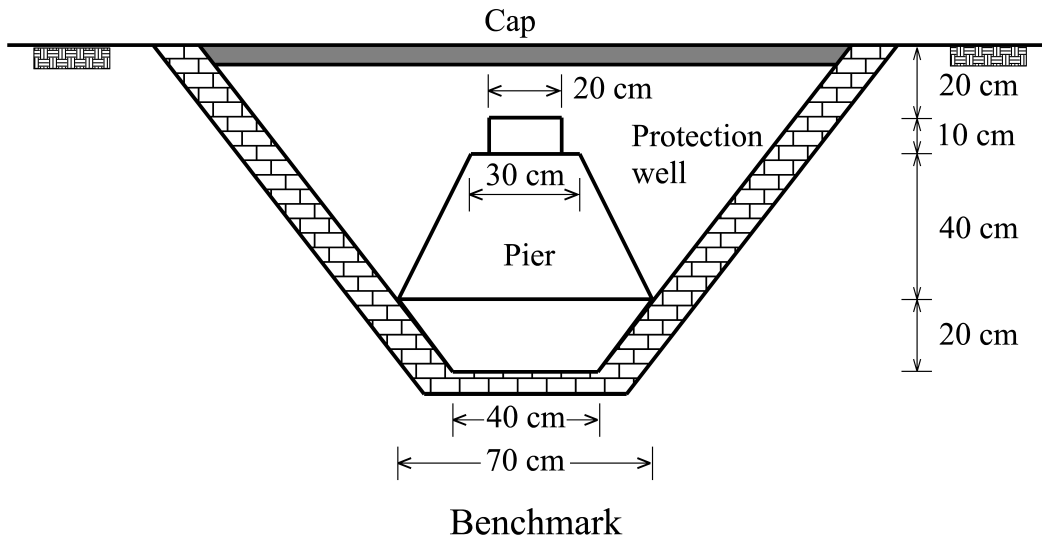

**Fig. S6.** Configuration of reference point (benchmark).

## SUPPLEMENTAL DATA

Cross-section of concrete strut

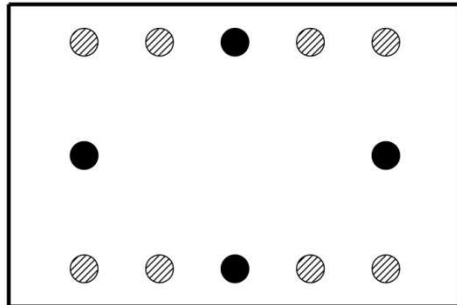

Notes:

- Reinforcing bar with instrumented stress meter
- ⊘ Reinforcing bar

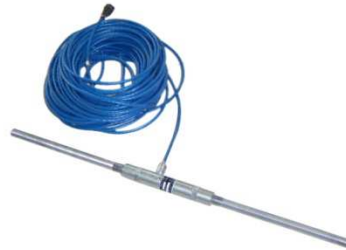

Stress meter adopted

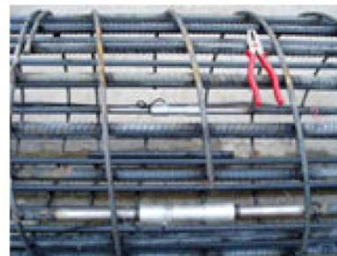

Reinforcing bars instrumented with stress meters

**Fig. S7.** Instrumentation of reinforced concrete strut for axial strut force.

# SUPPLEMENTAL DATA

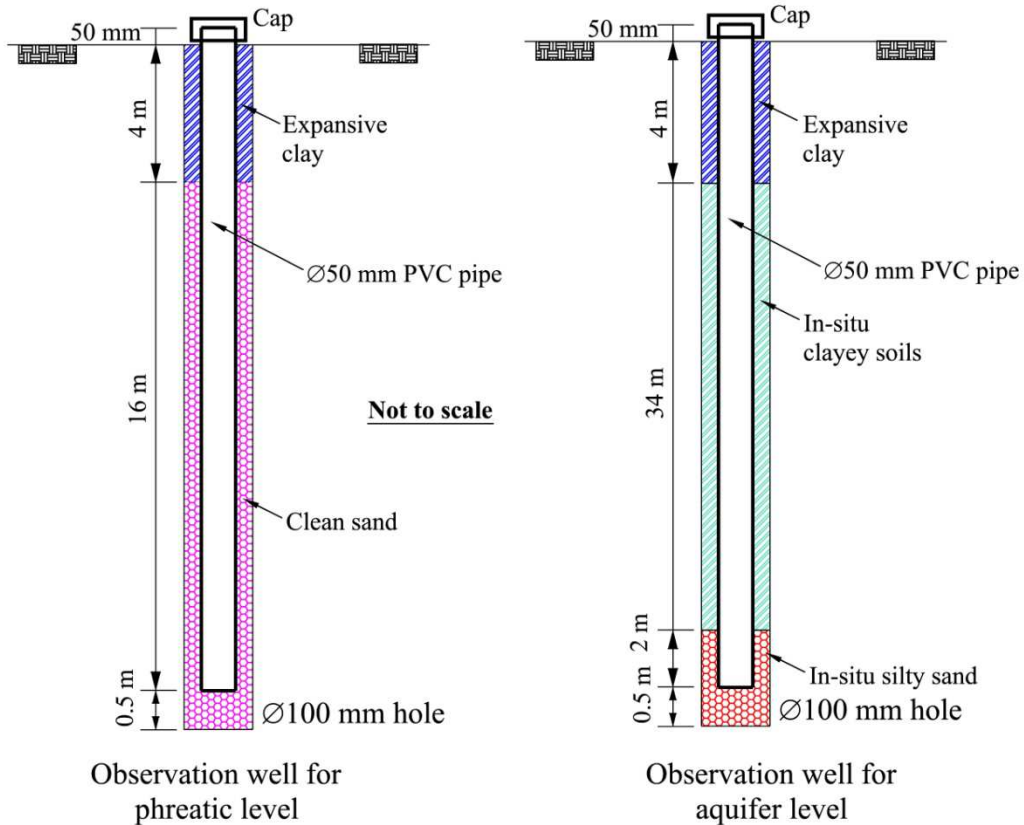

**Fig. S8.** Instrumentation for ground water levels.

## SUPPLEMENTAL DATA

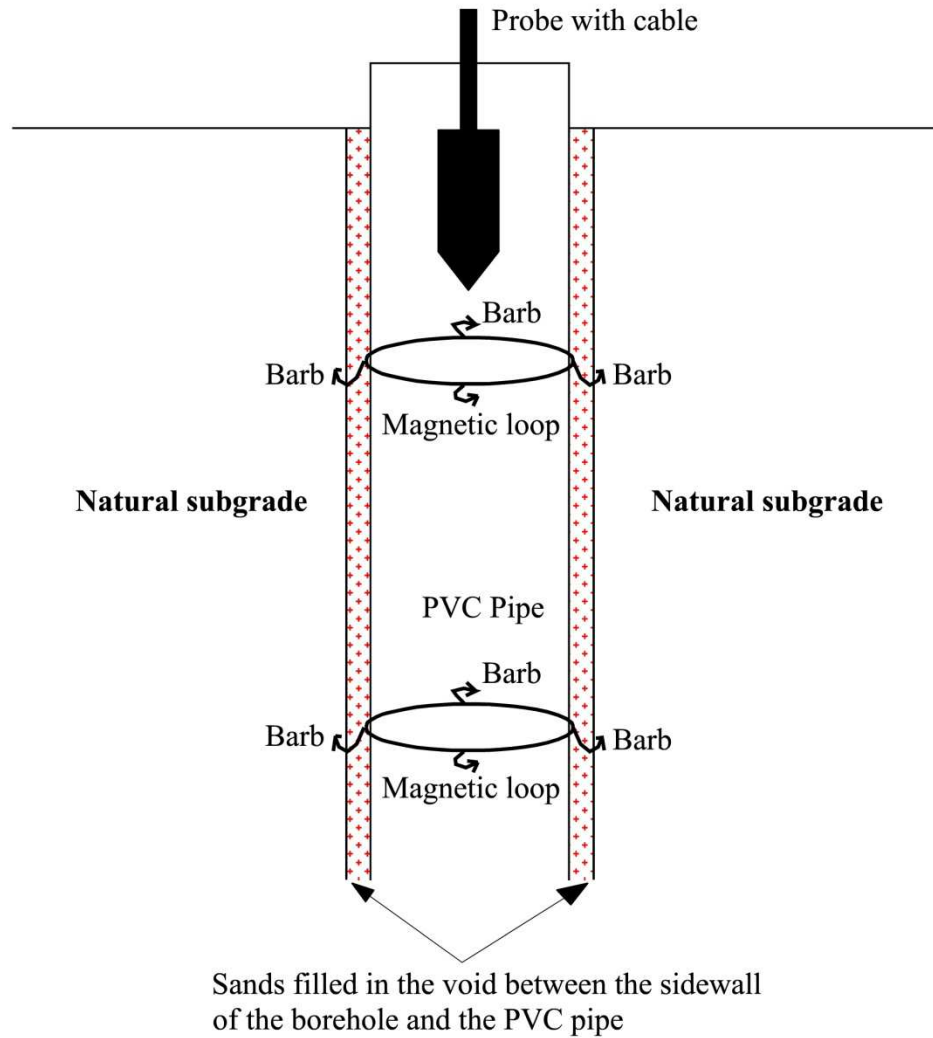

**Fig. S9.** Instrumentation for measuring basal rebound.

# SUPPLEMENTAL DATA

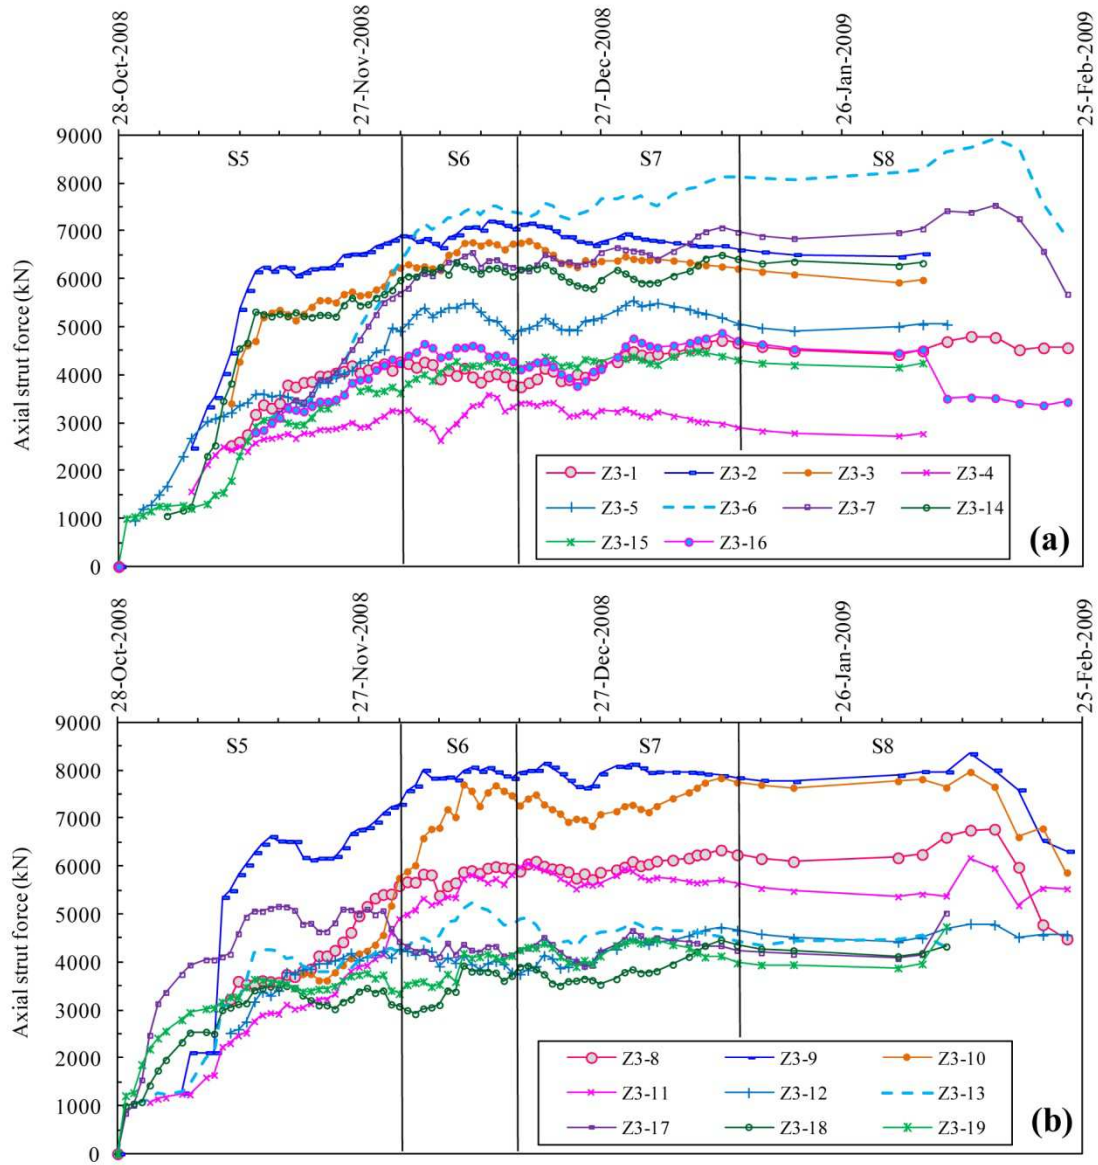

**Fig. S10.** Development of axial strut forces at level 3: (a) diagonal struts; (b) normal struts.
